# Supplementary material for: High-Quality Nucleic Acid Isolation from Hard-to-Lyse Bacterial Strains Using PMAP-36, a Broad-Spectrum Antimicrobial Peptide
Source: MDPI journal article supplement (doi:10.3390/ijms22084149), 2021-04-16
Supplement: s1 [file s1]

Article

# High-Quality Nucleic Acid Isolation from Hard-to-Lyse Bacterial Strains Using PMAP-36, a Broad-Spectrum Antimicrobial Peptide

Hye-sun Cho, Munjeong Choi, Yujung Lee, Hyoim Jeon, Byeongyong Ahn, Nagasundarapandian Soundrarajan, Kwonho Hong, Jin-Hoi Kim and Chankyu Park

## Supplementary information

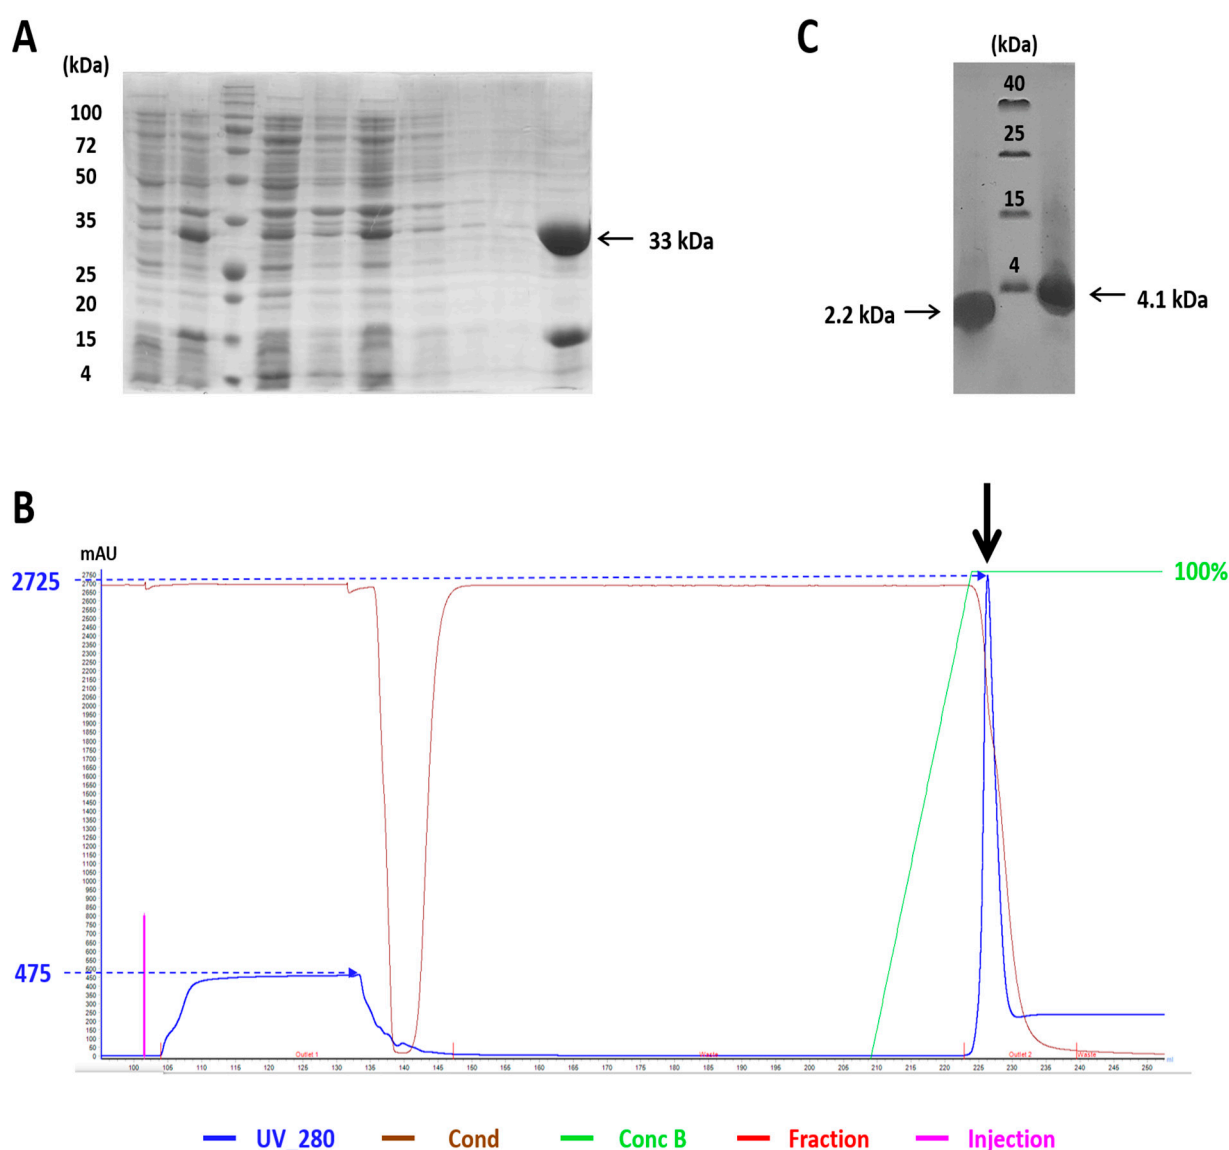

**Figure S1.** AMP production. **(A)** A polyacrylamide (12% SDS-PAGE) gel image showing DL4GFP-PMAP-36 insoluble extracts (33 kDa) indicated by an arrow. **(B)** The results of Ni affinity chromatography showing the target peak indicated by an arrow. **(C)** The images of purified PG-1 (2.2 kDa) and PMAP-36 (4.1 kDa) separated in 16% Tris-Tricine PAGE and stained with Coomassie blue.

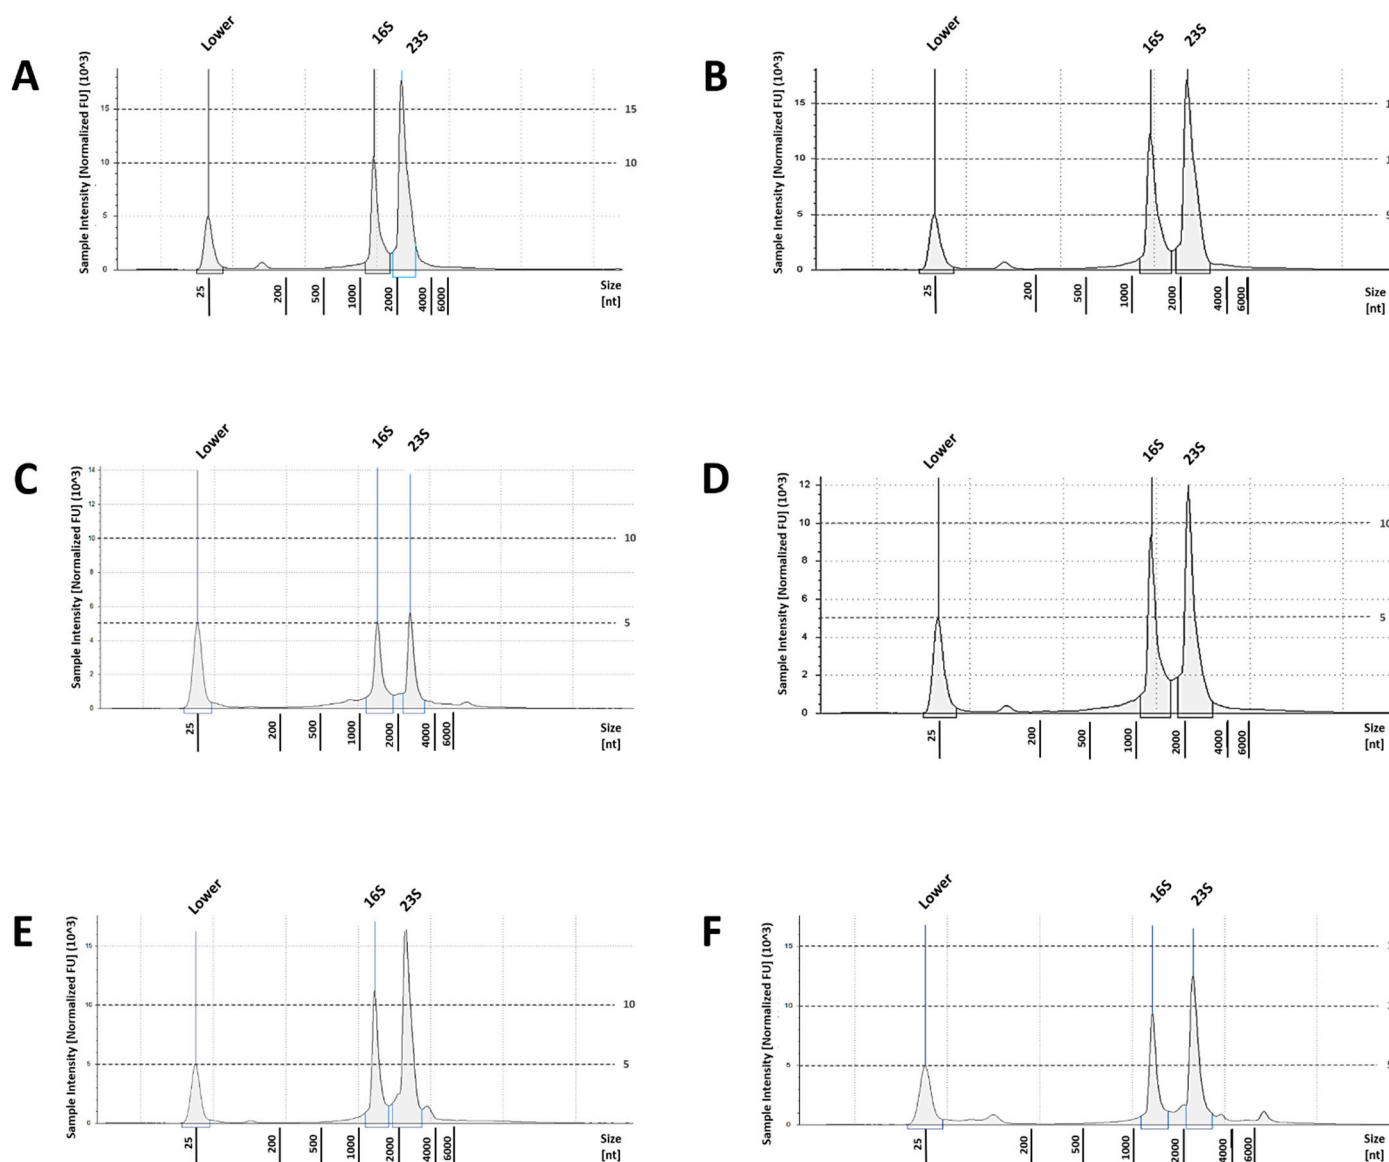

**Figure S2.** Electropherogram images from the TapeStation System (Agilent) to estimate RNA quality using different cell lysis methods. RNA was isolated from *S. aureus* ATCC 6538 ( $1 \times 10^9$  cells). The results from 200  $\mu$ g PMAP-36 for 4 h (A), 200  $\mu$ g Lysostaphin for 30 min (B), bead beating only (C), 200  $\mu$ g Lysostaphin + 200  $\mu$ g PMAP-36 for 30 min (D), and 200  $\mu$ g PMAP-36 peptide treatment for 30 min combined with subsequent bead beating (E) methods were compared. The RNA quality from *S. typhimurium* ATCC 14028 using 200  $\mu$ g PMAP-36 for an 8 h reaction is shown in (F). RIN values for A to F were 9.3, 9.3, 8.3, 9.0, 9.3, and 9.3, respectively. *S. aureus*, *Staphylococcus aureus*; *S. typhimurium*, *Salmonella typhimurium*.

**A**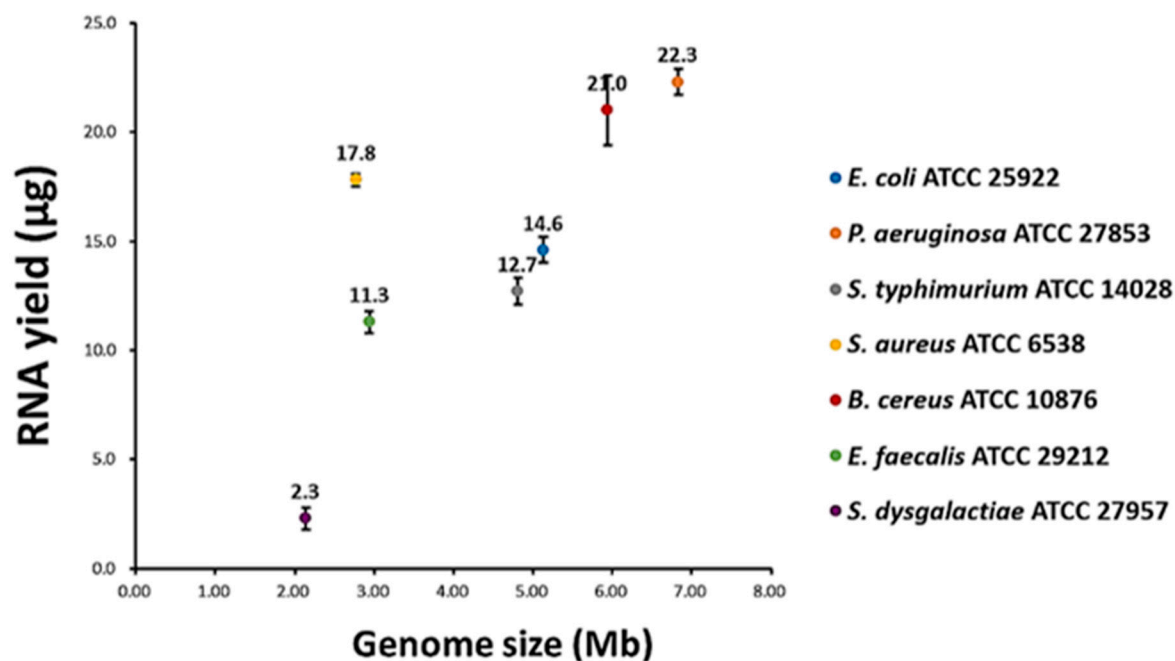**B**

| Strain                            | Genome size |                          | Cell size (µm)      | Reference                            |
|-----------------------------------|-------------|--------------------------|---------------------|--------------------------------------|
|                                   | (Mb)        | GenBank accession number |                     |                                      |
| <i>E. coli</i> ATCC 25922         | 5.13        | CP009072.1               | 1 to 2 x 0.5        | National Academy of Sciences, 1999   |
| <i>P. aeruginosa</i> ATCC 27853   | 6.83        | CP011857.1               | 1 to 5 x 0.5 to 1.0 | Lederberg et al., 2000               |
| <i>S. typhimurium</i> ATCC 14028  | 4.81        | AL513382.1               | 2 to 5 x 0.5 to 1.5 | Public Health Agency of Canada, 2010 |
| <i>S. aureus</i> ATCC 6538        | 2.77        | NZ_CP020020.1            | 1                   | Monteiro et al., 2015                |
| <i>B. cereus</i> ATCC 10876       | 5.94        | CM000715.1               | 3 to 5 x 1          | Stecchini et al., 2009               |
| <i>E. faecalis</i> ATCC 29212     | 2.94        | CP008816.1               | 0.6 to 2.0          | Oyama et al., 2017                   |
| <i>S. dysgalactiae</i> ATCC 27957 | 2.14        | CM001076.1               | 1.07 to 1.21        | Kokkinosa et al., 1998               |

**Figure S3.** Results showing the relationship between total RNA yields and bacterial genome sizes. **(A)** The bacTable 2. 76). **(B)** Cell and genome sizes of the bacteria used are shown. The cell sizes for rod and spherical bacteria are indicated by “length × width” and “diameter,” respectively. *E. coli*, *Escherichia coli*; *P. aeruginosa*, *Pseudomonas aeruginosa*; *S. typhimurium*, *Salmonella typhimurium*; *E. faecalis*, *Enterococcus faecalis*; *B. cereus*, *Bacillus cereus*; *S. aureus*, *Staphylococcus aureus*; *S. dysgalactiae*, *Streptococcus dysgalactiae*.

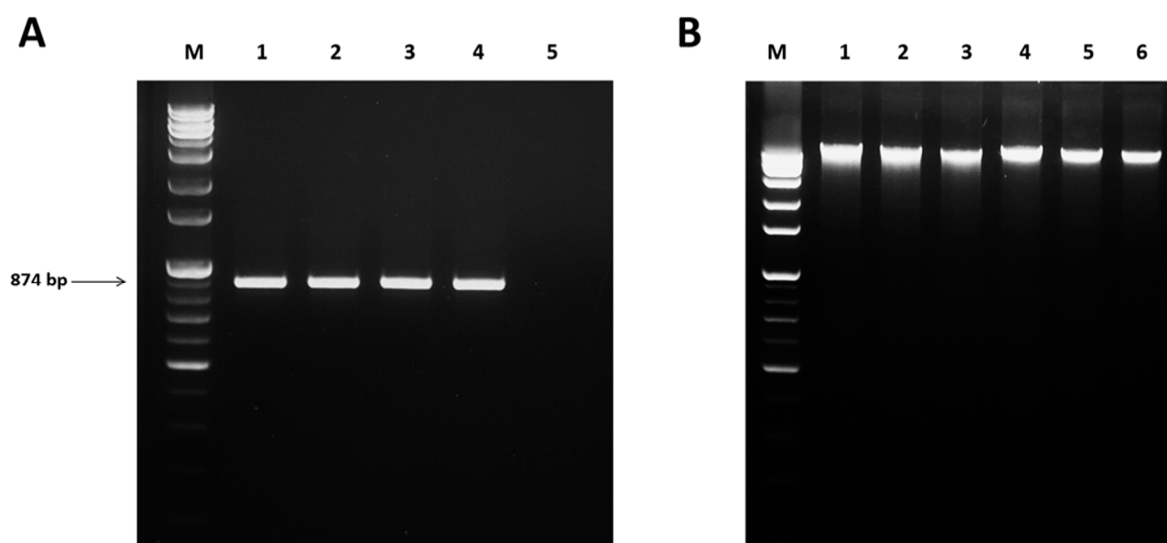

**Figure S4.** Gel images showing the results of electrophoretic analysis on extracted nucleic acids. **(A)** Results of the analysis of 16S rRNA amplicons from the reverse transcription PCR of RNA isolated using PMAP-36 from *E. coli*, *P. aeruginosa*, *S. aureus*, *E. faecalis*, and a negative control (lanes 1 to 5, respectively). The amplicons are indicated by an arrow on the left. **(B)** The electrophoretic image of genomic DNA isolated using lysostaphin (lane 1 to 3) and PMAP-36 (lane 4 to 6) treatments from *S. aureus*. A total of 200 ng of DNA was loaded. *E. coli*, *Escherichia coli*; *P. aeruginosa*, *Pseudomonas aeruginosa*; *S. aureus*, *Staphylococcus aureus*; *E. faecalis*, *Enterococcus faecalis*.

**Table S1.** Additional data on RNA isolation using lysozyme and nisin from *S. aureus* ATCC 6538.

| Treatment                                 | Yield                    | Optical density                    |                                    |
|-------------------------------------------|--------------------------|------------------------------------|------------------------------------|
|                                           | Amount ( $\mu\text{g}$ ) | A <sub>260</sub> /A <sub>280</sub> | A <sub>260</sub> /A <sub>230</sub> |
| 5 mg Lysozyme for 30 min                  | 0.1 $\pm$ 0.1            | 1.60 $\pm$ 0.01                    | 0.40 $\pm$ 0.15                    |
| 100 $\mu\text{g}$ Nisin for 30 min        | 0.9 $\pm$ 0.3            | 1.45 $\pm$ 0.05                    | 1.03 $\pm$ 0.11                    |
| 100 $\mu\text{g}$ Nisin for 4 h           | 2.7 $\pm$ 0.3            | 1.68 $\pm$ 0.05                    | 1.23 $\pm$ 0.07                    |
| 5 mg Lysozyme + 200 $\mu\text{g}$ PMAP-36 | 1.2 $\pm$ 0.1            | 1.71 $\pm$ 0.03                    | 0.56 $\pm$ 0.10                    |

**Table S2.** Additional data for the optimization of bacterial lysis methods for RNA isolation against different bacterial species.

| Strain                            | Treatment <sup>a</sup>            | Reaction buffer <sup>b</sup> | Yield                    | Optical density                    |                                    |
|-----------------------------------|-----------------------------------|------------------------------|--------------------------|------------------------------------|------------------------------------|
|                                   |                                   |                              | Amount ( $\mu\text{g}$ ) | A <sub>260</sub> /A <sub>280</sub> | A <sub>260</sub> /A <sub>230</sub> |
| <i>B. cereus</i> ATCC 10876       | No treatment                      | TE or W                      | 0.5 $\pm$ 0.1            | 1.39 $\pm$ 0.04                    | 1.32 $\pm$ 0.09                    |
| <i>E. faecalis</i> ATCC 29212     | No treatment                      | TE or W                      | 0.8 $\pm$ 0.1            | 1.38 $\pm$ 0.05                    | 0.46 $\pm$ 0.34                    |
| <i>S. dysgalactiae</i> ATCC 27957 | No treatment                      | TE or W                      | 0.5 $\pm$ 0.3            | 1.40 $\pm$ 0.09                    | 0.57 $\pm$ 0.31                    |
|                                   | 5 mg Mutanolysin for 30 min       | TE or W                      | 0.5 $\pm$ 0.1            | 1.38 $\pm$ 0.07                    | 0.98 $\pm$ 0.02                    |
|                                   | 200 $\mu\text{g}$ Nisin for 4 h   | TE or W                      | 0.6 $\pm$ 0.1            | 1.11 $\pm$ 0.03                    | 0.87 $\pm$ 0.32                    |
|                                   | 200 $\mu\text{g}$ PMAP-36 for 4 h | W                            | 2.3 $\pm$ 0.5            | 1.54 $\pm$ 0.09                    | 0.66 $\pm$ 0.16                    |
|                                   |                                   | TE                           | 0.9 $\pm$ 0.3            | 1.48 $\pm$ 0.01                    | 0.55 $\pm$ 0.14                    |
| <i>P. aeruginosa</i> ATCC 27853   | No treatment                      | W                            | 0.7 $\pm$ 0.2            | 1.23 $\pm$ 0.02                    | 0.57 $\pm$ 0.21                    |
|                                   |                                   | TE                           | 21.1 $\pm$ 0.6           | 1.83 $\pm$ 0.06                    | 1.29 $\pm$ 0.54                    |
|                                   | 1 mg Lysozyme for 30 min          | W                            | 1.2 $\pm$ 0.1            | 1.43 $\pm$ 0.03                    | 1.42 $\pm$ 0.23                    |
|                                   |                                   | TE                           | 21.0 $\pm$ 0.1           | 2.11 $\pm$ 0.02                    | 2.24 $\pm$ 0.02                    |
|                                   | 200 $\mu\text{g}$ PMAP-36 for 4 h | W                            | 2.1 $\pm$ 0.1            | 1.29 $\pm$ 0.04                    | 1.04 $\pm$ 0.13                    |
|                                   |                                   | TE                           | 22.3 $\pm$ 0.6           | 2.2 $\pm$ 0.01                     | 2.04 $\pm$ 0.11                    |
| <i>S. typhimurium</i> ATCC 14028  | No treatment                      | TE or W                      | 1.5 $\pm$ 0.2            | 1.67 $\pm$ 0.01                    | 0.67 $\pm$ 0.48                    |

<sup>a</sup> A 5 min vortexing was carried out after all treatments. No treatment corresponds to vortexing only without any treatment.

<sup>b</sup> Tris-EDTA buffer and RNase-free water are indicated as "TE" and "W," respectively.

**Table S3.** Analysis of the effect of reaction buffers for RNA extraction from streptococci using PMAP-36.

| Strain                                         | Reaction buffer # | Yield       | Optical density                    |                                    |
|------------------------------------------------|-------------------|-------------|------------------------------------|------------------------------------|
|                                                |                   | Amount (µg) | A <sub>260</sub> /A <sub>280</sub> | A <sub>260</sub> /A <sub>230</sub> |
| <i>S. agalactiae</i> ATCC 27956                | TE                | 0.8±0.2     | 1.23±0.08                          | 0.79±0.03                          |
|                                                | W                 | 2.0±0.3     | 1.67±0.01                          | 0.59±0.23                          |
| <i>S. dysgalactiae</i> ATCC 27957              | TE                | 0.9±0.3     | 1.48±0.01                          | 0.55±0.14                          |
|                                                | W                 | 2.3±0.5     | 1.54±0.09                          | 0.66±0.16                          |
| <i>S. iniae</i> KCTC 3657                      | TE                | 0.5±0.1     | 1.28±0.02                          | 0.51±0.07                          |
|                                                | W                 | 1.6±0.4     | 1.61±0.06                          | 0.46±0.25                          |
| <i>S. equi subsp. zooepidemicus</i> ATCC 43079 | TE                | 0.6±0.2     | 1.23±0.08                          | 0.79±0.03                          |
|                                                | W                 | 1.7±0.1     | 1.70±0.06                          | 0.88±0.05                          |

# The RNA isolation efficiency of 200 µg of PMAP-36 was tested for 4 h of incubation time at 37 °C. Tris-EDTA buffer and RNase-free water are indicated as “TE” and “W,” respectively.

**Table S4.** Comparison of RNA isolation efficiency using lysozyme in different conditions from *S. typhimurium*.

| Amount of lysozyme (mg) | Reaction time (h) | Concentration of EDTA (mM) | Yield       | Optical density                    |                                    |
|-------------------------|-------------------|----------------------------|-------------|------------------------------------|------------------------------------|
|                         |                   |                            | Amount (µg) | A <sub>260</sub> /A <sub>280</sub> | A <sub>260</sub> /A <sub>230</sub> |
| 5                       | 0.5               | 1                          | 1.2±0.2     | 1.38±0.05                          | 1.16±0.35                          |
|                         | 2.0               |                            | 3.4±0.9     | 2.02±0.03                          | 1.80±0.06                          |
|                         | 4.0               |                            | 4.5±0.0     | 2.08±0.02                          | 1.63±0.64                          |
| 1                       | 0.5               | 1                          | 0.3±0.0     | 1.97±0.11                          | 1.20±0.78                          |
|                         | 2.0               |                            | 4.7±0.2     | 2.09±0.01                          | 1.43±0.92                          |
|                         | 4.0               |                            | 5.9±0.1     | 2.07±0.03                          | 1.97±0.09                          |
| 1                       | 0.5               | 5                          | 3.0±0.1     | 1.96±0.10                          | 0.78±0.33                          |
|                         | 2.0               |                            | 3.0±0.3     | 2.01±0.08                          | 1.11±0.66                          |
|                         | 4.0               |                            | 3.2±0.2     | 2.07±0.02                          | 1.29±0.31                          |
| 1                       | 0.5               | 10                         | 1.5±0.1     | 1.96±0.12                          | 1.12±0.27                          |
|                         | 2.0               |                            | 1.5±0.0     | 2.05±0.02                          | 1.44±0.40                          |
|                         | 4.0               |                            | 1.9±0.4     | 1.97±0.11                          | 0.82±0.61                          |

**Table S5.** Comparison of the efficiency of genomic DNA isolation from *S. aureus* between lysostaphin and PMAP-36 methods.

| Treatment                     | Vortexing | Yield       | Optical density                    |                                    |
|-------------------------------|-----------|-------------|------------------------------------|------------------------------------|
|                               |           | Amount (µg) | A <sub>260</sub> /A <sub>280</sub> | A <sub>260</sub> /A <sub>230</sub> |
| 200 µg Lysostaphin for 30 min | None      | 16.9±1.8    | 2.05±0.03                          | 2.20±0.25                          |
| 200 µg PMAP-36 for 4 h        | None      | 5.5±0.8     | 1.34±0.01                          | 0.60±0.01                          |
| 200 µg PMAP-36 for 4 h        | 5 min     | 17.0±2.1    | 2.11±0.03                          | 2.13±0.21                          |

**Table S6.** Antimicrobial activities of PG-1 and melittin to hard-to-lyse bacterial strains.

| Strains                |                                   | MIC (µg/mL, µM) |           |
|------------------------|-----------------------------------|-----------------|-----------|
|                        |                                   | PG-1            | Melittin  |
| Gram-positive bacteria | <i>S. aureus</i> ATCC 6538        | 43 (19.9)       | 2 (0.7)   |
|                        | <i>B. cereus</i> ATCC 10876       | > 160 (74.1)    | 10 (3.5)  |
|                        | <i>E. faecalis</i> ATCC 29212     | 160 (74.1)      | 3.5 (1.2) |
|                        | <i>S. dysgalactiae</i> ATCC 27957 | 31.5 (14.6)     | 7 (2.58)  |
| Gram-negative bacteria | <i>S. typhimurium</i> ATCC 14028  | 85 (39.4)       | 45 (15.8) |

**Table S7.** The results of RNA extraction using PG-1 and melittin from hard-to-lyse bacteria.

|                        | Strain                            | Treatment               | Yield       | Optical density                    |                                    |
|------------------------|-----------------------------------|-------------------------|-------------|------------------------------------|------------------------------------|
|                        |                                   |                         | Amount (µg) | A <sub>260</sub> /A <sub>280</sub> | A <sub>260</sub> /A <sub>230</sub> |
| Gram-positive bacteria | <i>S. aureus</i> ATCC 6538        | 200 µg PG-1 for 4 h     | 1.6±0.2     | 1.88±0.09                          | 1.24±0.06                          |
|                        |                                   | 200 µg Melittin for 4 h | 2.2±0.1     | 1.85±0.11                          | 1.85±0.03                          |
|                        | <i>B. cereus</i> ATCC 10876       | 200 µg PG-1 for 4 h     | 8.7±0.1     | 2.10±0.01                          | 2.03±0.15                          |
|                        |                                   | 200 µg Melittin for 4 h | 21.2±0.1    | 2.16±0.01                          | 2.17±0.09                          |
|                        | <i>E. faecalis</i> ATCC 29212     | 200 µg PG-1 for 4 h     | 3.0±0.4     | 1.87±0.06                          | 1.54±0.06                          |
|                        |                                   | 200 µg Melittin for 4 h | 3.3±0.2     | 1.97±0.06                          | 1.71±0.10                          |
|                        | <i>S. dysgalactiae</i> ATCC 27957 | 200 µg PG-1 for 4 h     | 0.9±0.1     | 1.51±0.01                          | 1.46±0.19                          |
|                        |                                   | 200 µg Melittin for 4 h | 1.2±0.2     | 1.52±0.07                          | 1.09±0.14                          |
| Gram-negative bacteria | <i>S. typhimurium</i> ATCC 14028  | 200 µg PG-1 for 4 h     | 8.1±0.4     | 2.09±0.02                          | 1.96±0.04                          |
|                        |                                   | 200 µg PG-1 for 8 h     | 7.4±0.1     | 2.12±0.01                          | 2.16±0.07                          |
|                        |                                   | 200 µg Melittin for 4 h | 7.4±0.1     | 2.05±0.03                          | 1.97±0.16                          |
|                        |                                   | 200 µg Melittin for 8 h | 4.7±0.6     | 2.04±0.01                          | 1.96±0.14                          |

**Table S8.** Antimicrobial activity of PMAP-36 against *E. coli* ATCC 25922 under different pH conditions.

| pH  | MIC (µg/mL, (µM)) |
|-----|-------------------|
|     | PMAP-36           |
| 5.0 | 3.5 (1.0)         |
| 6.0 | 4.5 (1.1)         |
| 7.0 | 6.0 (1.4)         |
| 7.5 | 6.0 (1.4)         |
